# Supplementary material for: Self-assembly of the sodium salts of fatty acids into limpid hydrogels through non-covalent interactions with peptides
Source: Royal Society of Chemistry journal article supplement (doi:10.1039/c5ra09625a), 2015-01-01
Supplement: c5ra09625a1.pdf [file c5ra09625a1.pdf]

## **Self-assembly of sodium salts of fatty acids into limpid hydrogels through non-covalent interactions with peptides**

Kai Zhou<sup>a</sup>, Senpei Yang<sup>a</sup>, Guanghua Zhao<sup>a,\*</sup>, Yong Ning<sup>b</sup>, and Chuanshan Xu<sup>c,\*</sup>

*<sup>a</sup>CAU & ACC Joint-Laboratory of Space Food, College of Food Science and Nutritional Engineering, China Agricultural University, Beijing Key Laboratory of Functional Food from Plant Resources, Beijing 100083, China*

*<sup>b</sup>School of Laboratory Medicine, Hubei University of Chinese Medicine, NO. 1 Huangjia Lake West Road, Wuhan 430065, P.R. China*

*<sup>c</sup>School of Chinese Medicine (SCM), Chinese University of Hong Kong, Hong Kong, China*

\*Corresponding author

Guanghua Zhao, E-mail: [gzhao@cau.edu.cn](mailto:gzhao@cau.edu.cn). Chuanshan Xu, E-mail: [csxu@cuhk.edu.hk](mailto:csxu@cuhk.edu.hk)

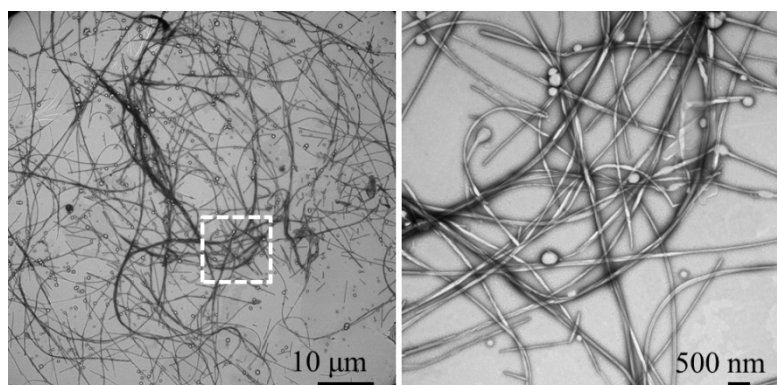

**Figure S1.** (A) TEM images of SS fibers induced by PLL<sub>5</sub> for 12 h. (B) The enlargement in the focus box in (A). Conditions: [SS] = 1.35 mM; [PLL<sub>5</sub>] = 0.75 mM, at 25 °C. All quoted concentrations are final concentrations.

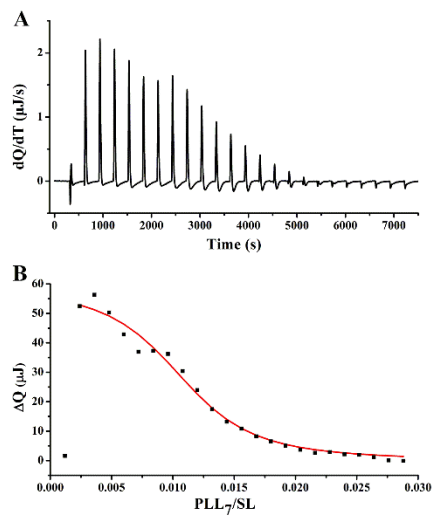

**Figure S2.** ITC measurement of SL binding to PLL<sub>7</sub> at pH 7.40 (10 mM Tris) and 25 °C. A) Raw data obtained for continuous injection of 2.0  $\mu\text{L}$  PLL<sub>7</sub> solution of 0.28 mM to 2.08 mM SL solution. B) Titration plot derived from the integrated heats of binding of raw data, corrected for the heat of dilution.

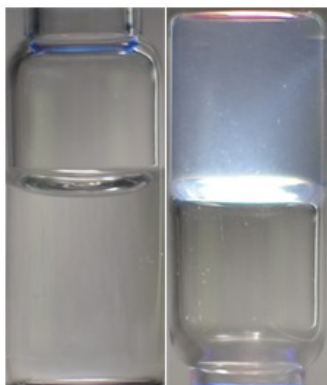

**Figure S3.** Photos of SL-PLL<sub>7</sub> hydrogel. The left corresponds to the photo of a solution sample immediately after mixing SL with PLL<sub>7</sub>, and the right represents the photo of a hydrogel sample under inversion test, and the hydrogel was formed 12 h after of mixing SL with PLL<sub>7</sub>. Conditions: [SL] = 16.78 mM, [PLL<sub>7</sub>] = 0.546 mM. All quoted concentrations are final concentrations.
